# Supplementary material for: Atmospheric carbonyl compounds are crucial in regional ozone heavy pollution: insights from the Chengdu Plain Urban Agglomeration, China
Source: Copernicus journal article supplement (doi:10.5194/acp-25-1899-2025), 2025-02-12
Supplement: Supplementary file 1 [file acp-25-1899-2025-supplement.pdf]

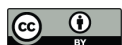

*Supplement of*

## **Atmospheric carbonyl compounds are crucial in regional ozone heavy pollution: insights from the Chengdu Plain Urban Agglomeration, China**

**Jiemeng Bao et al.**

*Correspondence to:* Hong Li (lihong@craes.org.cn)

The copyright of individual parts of the supplement might differ from the article licence.

**Summary:** 12 pages, 5 figures and 7 tables.

**Contents:**

**Table S1.** Information of off-line sampling points of atmospheric carbonyl compounds.

**Table S2.** Detection information for 15 kinds of carbonyl compounds by HPLC/UV/MS.

**Table S3.** VOCs Species of Anthropogenic and Biogenic VOCs Considered in the Formation of Formaldehyde, Acetaldehyde, and Acetone

**Figure S1.** Average concentrations of ozone and carbonyl compounds at each site in the CPUA during the observation period.

**Table S4.** Daily average value and proportion of volume concentration of carbonyl compounds at each site in the CPUA during the observation period.

**Table S5.** Atmospheric photochemical reactivity of carbonyl compounds  $L_{OH}$  and OFP at sites in the CPUA during the observation period.

**Table S6.** Contribution Values of Various VOC Compounds to Ozone Formation Potential (OFP) at Five Sites in the Chengdu Plain Urban Agglomeration during the Observation Period.

**Figure S2.** Top Ten Species of Carbonyl Compounds with  $L_{OH}$  at Various Sites in the CPUA during the Observation Period.

**Figure S3.** Contribution Values of Various VOC Compounds to OFP at Five Sites in the CPUA during the Observation Period.

**Figure S4.** Daily Variation of Ozone Assessment Values, Pollution Status, and Ozone Sensitivity at Sites in the CPUA during the Observation Period.

**Table S7.** Proportion of formaldehyde, acetaldehyde and acetone by source at each site in the CPUA during the observation period.

**Figure S5.** Clustering of backward trajectories of sites in the CPUA during the observation period.

**Table S1.** Information of off-line sampling points of atmospheric carbonyl compounds.

| Sites location  | Sites abbreviation | Latitude and longitude (° E, ° N) | Type of sites | Sampling details                                                                                                                                                                                                                                                                                                   |
|-----------------|--------------------|-----------------------------------|---------------|--------------------------------------------------------------------------------------------------------------------------------------------------------------------------------------------------------------------------------------------------------------------------------------------------------------------|
| Mianyang        | MY                 | 104.67, 31.47                     | urban         | <b>Measurement periods:</b> 2019/08/04 0:00-2019/08/18 22:00<br><b>Sampling time for one day</b><br>0:00-2:00, 2:00-4:00, 4:00-6:00, 6:00-8:00, 8:00-10:00, 10:00-12:00, 12:00-14:00, 14:00-16:00, 16:00-18:00, 18:00-20:00, 20:00-22:00, 22:00-24:00.<br><b>Sampling volume:</b><br>Sampling 96 L for each sample |
| Deyang          | DY                 | 104.41, 31.13                     | urban         |                                                                                                                                                                                                                                                                                                                    |
| Chengdu         | CDHKY              | 104.05, 30.66                     | urban         |                                                                                                                                                                                                                                                                                                                    |
| Xinjin, Chengdu | XJ                 | 103.85, 30.40                     | suburban      |                                                                                                                                                                                                                                                                                                                    |
| Suining         | SN                 | 105.56, 30.57                     | urban         |                                                                                                                                                                                                                                                                                                                    |
| Ziyang          | ZY                 | 104.63, 30.14                     | urban         |                                                                                                                                                                                                                                                                                                                    |
| Meishan         | MS                 | 103.85, 30.08                     | urban         |                                                                                                                                                                                                                                                                                                                    |
| Yaan            | YA                 | 102.99, 29.97                     | urban         |                                                                                                                                                                                                                                                                                                                    |
| Leshan          | LS                 | 103.75, 29.60                     | urban         |                                                                                                                                                                                                                                                                                                                    |

**Table S2.** Detection information for 15 kinds of carbonyl compounds by HPLC/UV/MS.

| Species<br>(measured by DNPH derivatization) | Retention     |            | Linear           | Correlation                      | Detection        | Quantification   |
|----------------------------------------------|---------------|------------|------------------|----------------------------------|------------------|------------------|
|                                              | Time<br>(min) | Resolution | Range<br>(ng/mL) | Coefficient<br>(R <sup>2</sup> ) | Limit<br>(ng/mL) | Limit<br>(ng/mL) |
| formaldehyde                                 | 4.97          | ---        | 15-600           | 1.0000                           | 0.56             | 1.87             |
| acetaldehyde                                 | 6.24          | 4.74       | 15-600           | 1.0000                           | 0.83             | 2.77             |
| acetone                                      | 8.13          | 0.85       | 15-600           | 1.0000                           | 1.28             | 4.25             |
| propionaldehyde                              | 8.70          | 1.63       | 15-600           | 1.0000                           | 1.37             | 4.57             |
| crotonaldehyde                               | 10.55         | 4.85       | 15-600           | 1.0000                           | 1.84             | 6.13             |
| butyraldehyde                                | 12.00         | 3.43       | 15-600           | 0.9998                           | 2.14             | 6.42             |
| benzaldehyde                                 | 13.31         | 2.83       | 15-600           | 0.9994                           | 3.29             | 9.89             |
| isovaleraldehyde                             | 16.20         | 5.24       | 15-600           | 0.9996                           | 3.63             | 12.10            |
| valeraldehyde                                | 17.13         | 1.52       | 15-600           | 0.9980                           | 3.53             | 11.75            |
| o-Tolualdehyde                               | 18.32         | 1.93       | 15-600           | 0.9992                           | 5.13             | 17.10            |
| m-Tolualdehyde                               | 18.95         | 0.98       | 15-600           | 0.9982                           | 5.12             | 17.07            |
| p-Tolualdehyde                               | 19.76         | 1.23       | 15-600           | 0.9978                           | 5.57             | 18.56            |
| hexaldehyde                                  | 24.21         | 8.18       | 15-600           | 0.9998                           | 2.93             | 9.78             |
| 2,5-dimethylbenzaldehyde                     | 24.75         | 1.35       | 15-600           | 0.9998                           | 3.51             | 11.71            |
| MACR                                         | 11.67         | 2.09       | 15-450           | 0.9994                           | 2.00             | 6.60             |

**Table S3.** VOCs Species of Anthropogenic and Biogenic VOCs Considered in the Formation of Formaldehyde, Acetaldehyde, and Acetone

| <b>No.</b> | <b>Category</b> | <b>CAS</b> | <b>Species</b>         |
|------------|-----------------|------------|------------------------|
| 1          | Alkanes         | 75-28-5    | Isobutane              |
| 2          | Alkanes         | 106-97-8   | n-Butane               |
| 3          | Alkanes         | 74-84-0    | Ethane                 |
| 4          | Alkanes         | 78-78-4    | Isopentane             |
| 5          | Alkanes         | 109-66-0   | n-Pentane              |
| 6          | Alkanes         | 74-98-6    | Propane                |
| 7          | Alkanes         | 75-83-2    | 2,2-dimethylbutane     |
| 8          | Alkanes         | 79-29-8    | 2,3-dimethylbutane     |
| 9          | Alkanes         | 107-83-5   | 2-Methylpentane        |
| 10         | Alkanes         | 287-92-3   | Cyclopentane           |
| 11         | Alkanes         | 96-14-0    | 3-Methylpentane        |
| 12         | Alkanes         | 110-54-3   | n-Hexane               |
| 13         | Alkanes         | 108-08-7   | 2,4-Dimethylpentane    |
| 14         | Alkanes         | 96-37-7    | Methylcyclopentane     |
| 15         | Alkanes         | 591-76-4   | 2-Methylhexane         |
| 16         | Alkanes         | 565-59-3   | 2,3-Dimethylpentane    |
| 17         | Alkanes         | 110-82-7   | Cyclohexane            |
| 18         | Alkanes         | 589-34-4   | 3-Methylhexane         |
| 19         | Alkanes         | 540-84-1   | 2,2,4-trimethylpentane |
| 20         | Alkanes         | 142-82-5   | n-Heptane              |
| 21         | Alkanes         | 108-87-2   | Methylcyclohexane      |
| 22         | Alkanes         | 123-91-1   | 1,4-Dioxane            |
| 23         | Alkanes         | 565-75-3   | 2,3,4-trimethylpentane |
| 24         | Alkanes         | 592-27-8   | 2-Methylheptane        |
| 25         | Alkanes         | 589-81-1   | 3-Methylheptane        |
| 26         | Alkanes         | 111-65-9   | Octane                 |
| 27         | Alkanes         | 111-84-2   | n-Nonane               |
| 28         | Alkanes         | 124-18-5   | n-Decane               |
| 29         | Alkanes         | 1120-21-4  | Undecane               |
| 30         | Alkanes         | 112-40-3   | Dodecane               |
| 31         | Alkenes         | 74-85-1    | Ethylene               |
| 32         | Alkenes         | 106-98-9   | 1-Butene               |
| 33         | Alkenes         | 106-99-0   | 1,3-Butadiene          |
| 34         | Alkenes         | 624-64-6   | trans-2-Butene         |
| 35         | Alkenes         | 590-18-1   | cis-2-Butene           |
| 36         | Alkenes         | 109-67-1   | 1-Pentene              |
| 37         | Alkenes         | 646-04-8   | trans-2-Pentene        |
| 38         | Alkenes         | 78-79-5    | Isoprene               |
| 39         | Alkenes         | 627-20-3   | cis-2-Pentene          |

|    |                       |          |                         |
|----|-----------------------|----------|-------------------------|
| 40 | Alkenes               | 115-07-1 | Propylene               |
| 41 | Alkenes               | 592-41-6 | 1-Hexene                |
| 42 | Alkynes               | 74-86-2  | Acetylene               |
| 43 | Aromatic hydrocarbons | 71-43-2  | Benzene                 |
| 44 | Aromatic hydrocarbons | 108-88-3 | Toluene                 |
| 45 | Aromatic hydrocarbons | 100-41-4 | Ethylbenzene            |
| 46 | Aromatic hydrocarbons | 106-42-3 | m/p-Xylene              |
| 47 | Aromatic hydrocarbons | 95-47-6  | o-Xylene                |
| 48 | Aromatic hydrocarbons | 100-42-5 | Styrene                 |
| 49 | Aromatic hydrocarbons | 98-82-8  | Isopropylbenzene        |
| 50 | Aromatic hydrocarbons | 103-65-1 | n-Propylbenzene         |
| 51 | Aromatic hydrocarbons | 620-14-4 | 3-Ethyltoluene          |
| 52 | Aromatic hydrocarbons | 622-96-8 | 4-Ethyltoluene          |
| 53 | Aromatic hydrocarbons | 108-67-8 | 1,3,5-Trimethylbenzene  |
| 54 | Aromatic hydrocarbons | 611-14-3 | 2-Ethyltoluene          |
| 55 | Aromatic hydrocarbons | 95-63-6  | 1,2,4-Trimethylbenzene  |
| 56 | Aromatic hydrocarbons | 100-52-7 | Benzaldehyde            |
| 57 | Aromatic hydrocarbons | 526-73-8 | 1,2,3-Trimethylbenzene  |
| 58 | Aromatic hydrocarbons | 141-93-5 | 1,3-Diethylbenzene      |
| 59 | Aromatic hydrocarbons | 105-05-5 | 1,4-Diethylbenzene      |
| 60 | Aromatic hydrocarbons | 95-50-1  | 1,2-dichloro-benzene    |
| 61 | Aromatic hydrocarbons | 620-23-5 | 3-methyl-benzaldehyde   |
| 62 | Aromatic hydrocarbons | 120-82-1 | 1,2,4-trichloro-benzene |
| 63 | Aromatic hydrocarbons | 91-20-3  | Naphthalene             |

---

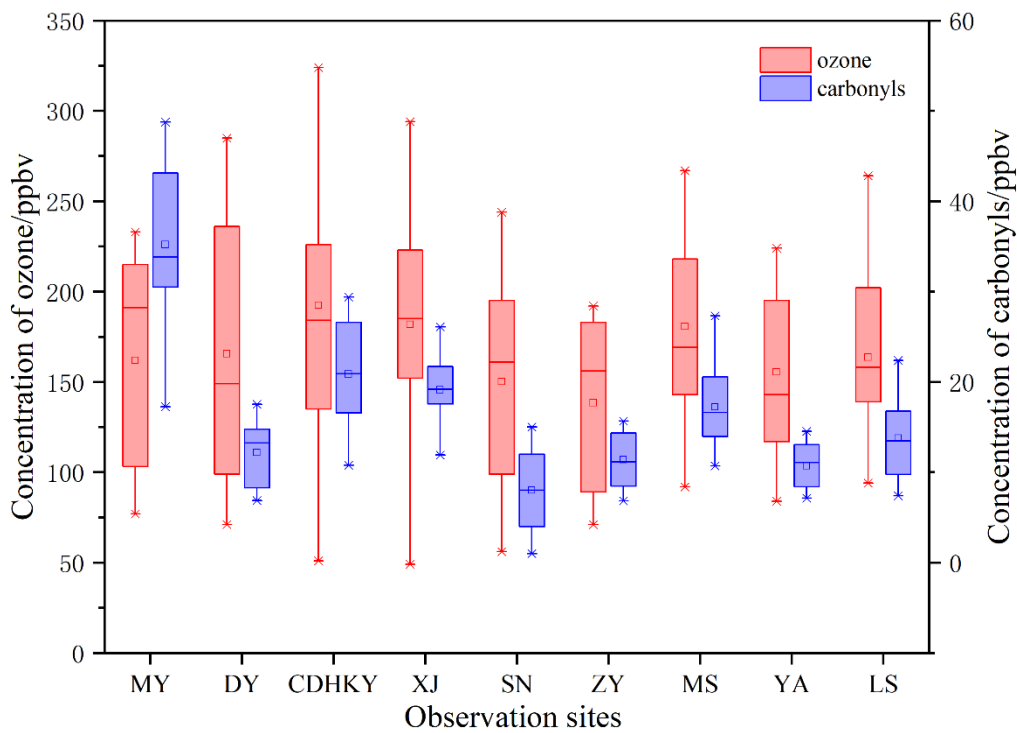

**Figure S1.** Average concentrations of ozone and carbonyl compounds at each site in the CPUA during the observation period.

**Table S4.** Daily average value and proportion of volume concentration of carbonyl compounds at each site in the CPUA during the observation period.

| Sites | Total volume concentration daily average (ppbv) | Carbonyl compounds daily average value (ppbv) and percentage (%) |                  |                 |                 |
|-------|-------------------------------------------------|------------------------------------------------------------------|------------------|-----------------|-----------------|
|       |                                                 | Formaldehyde                                                     | Acetaldehyde     | Acetone         | others          |
| MY    | 35.18                                           | 12.82<br>(36.4%)                                                 | 16.65<br>(47.3%) | 4.36<br>(12.4%) | 1.35<br>(3.84%) |
| DY    | 12.16                                           | 6.06<br>(49.9%)                                                  | 1.54<br>(12.7%)  | 2.80<br>(23.1%) | 1.75<br>(14.4%) |
| CDHKY | 20.84                                           | 10.09<br>(48.4%)                                                 | 3.65<br>(17.5%)  | 4.51<br>(21.7%) | 2.60<br>(12.5%) |
| XJ    | 19.04                                           | 8.87<br>(46.5%)                                                  | 2.33<br>(12.2%)  | 3.70<br>(19.4%) | 4.15<br>(21.8%) |
| SN    | 16.05                                           | 6.98<br>(43.5%)                                                  | 2.62<br>(16.3%)  | 3.14<br>(19.5%) | 3.32<br>(20.7%) |
| ZY    | 11.47                                           | 5.84<br>(51.0%)                                                  | 1.40<br>(12.2%)  | 3.23<br>(28.1%) | 1.00<br>(8.7%)  |
| MS    | 17.19                                           | 8.47<br>(49.3%)                                                  | 3.24<br>(18.8%)  | 2.15<br>(12.5%) | 3.33<br>(19.4%) |
| YA    | 10.70                                           | 6.36<br>(59.4%)                                                  | 0.88<br>(8.2%)   | 2.18<br>(20.4%) | 1.29<br>(12.0%) |
| LS    | 13.46                                           | 6.55<br>(48.7%)                                                  | 1.63<br>(12.1%)  | 2.91<br>(21.6%) | 2.37<br>(17.6%) |
| CPUA  | 17.34                                           | 8.00<br>(48.1%)                                                  | 3.37<br>(17.5%)  | 3.22<br>(19.9%) | 2.35<br>(17.6%) |

**Table S5.** Atmospheric photochemical reactivity of carbonyl compounds  $L_{OH}$  and OFP at sites in the CPUA during the observation period.

| Sites | $L_{OH}/s^{-1}$       |      |      |      |      |           | OFP/ ( $\mu g \cdot m^{-3}$ ) |        |        |      |       |           |
|-------|-----------------------|------|------|------|------|-----------|-------------------------------|--------|--------|------|-------|-----------|
|       | $\Sigma 15$ carbonyls | C1   | C2   | C3   | C3   | $\geq C4$ | $\Sigma 15$ carbonyls         | C1     | C2     | C3   | C3    | $\geq C4$ |
| MY    | 5.92                  | 2.18 | 3.48 | 0.14 | 0.05 | 0.06      | 238.11                        | 121.24 | 108.91 | 4.82 | 1.50  | 1.64      |
| DY    | 1.67                  | 1.03 | 0.32 | 0.08 | 0.08 | 0.15      | 76.13                         | 57.36  | 10.08  | 2.63 | 2.13  | 3.94      |
| CDHKY | 2.98                  | 1.72 | 0.76 | 0.15 | 0.15 | 0.19      | 133.41                        | 95.42  | 23.85  | 4.93 | 3.93  | 5.29      |
| XJ    | 2.84                  | 1.51 | 0.49 | 0.09 | 0.49 | 0.26      | 121.70                        | 83.87  | 15.23  | 3.30 | 11.90 | 7.41      |
| SN    | 2.36                  | 1.19 | 0.55 | 0.14 | 0.13 | 0.36      | 100.67                        | 65.98  | 17.15  | 4.60 | 3.10  | 9.83      |
| ZY    | 1.50                  | 1.00 | 0.29 | 0.12 | 0.07 | 0.03      | 71.12                         | 55.29  | 9.17   | 3.83 | 1.54  | 1.29      |
| MS    | 2.76                  | 1.44 | 0.68 | 0.12 | 0.20 | 0.31      | 118.31                        | 80.14  | 21.17  | 4.28 | 5.19  | 7.54      |
| YA    | 1.56                  | 1.08 | 0.18 | 0.15 | 0.12 | 0.03      | 74.63                         | 60.12  | 5.75   | 4.82 | 2.94  | 1.00      |
| LS    | 1.97                  | 1.12 | 0.34 | 0.10 | 0.23 | 0.19      | 86.61                         | 61.98  | 10.64  | 3.29 | 5.01  | 5.70      |

**Table S6.** Contribution Values of Various VOC Compounds to Ozone Formation Potential (OFP) at Five Sites in the Chengdu Plain Urban Agglomeration during the Observation Period.

| OFPs ( $\mu g/m^3$ )  | ZY     | YA     | SN     | LS     | MY     |
|-----------------------|--------|--------|--------|--------|--------|
| Alkanes               | 63.91  | 52.65  | 49.17  | 77.30  | 41.22  |
| Alkenes               | 170.74 | 165.97 | 113.79 | 169.46 | 168.85 |
| Alkynes               | 5.92   | 0.76   | 1.54   | 3.03   | 2.22   |
| Aromatic hydrocarbons | 53.90  | 24.02  | 46.17  | 71.21  | 41.95  |
| Carbonyl compounds    | 71.12  | 74.63  | 100.67 | 86.61  | 238.11 |
| Sum                   | 365.59 | 318.03 | 311.34 | 407.61 | 490.13 |
| Contribution          | 19.5%  | 23.5%  | 32.3%  | 21.2%  | 48.6%  |



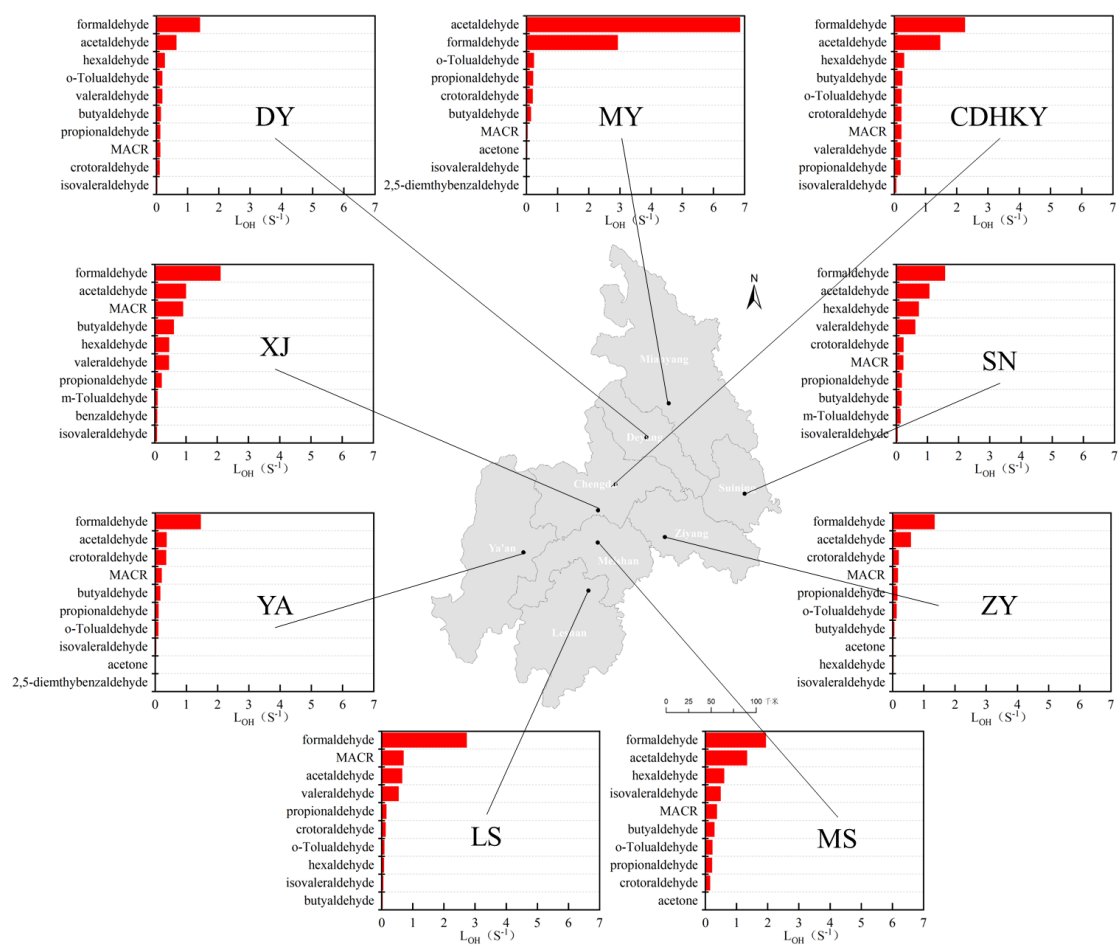

**Figure S2.** Top Ten Species of Carbonyl Compounds with  $L_{OH}$  at Various Sites in the CPUA during the Observation Period.

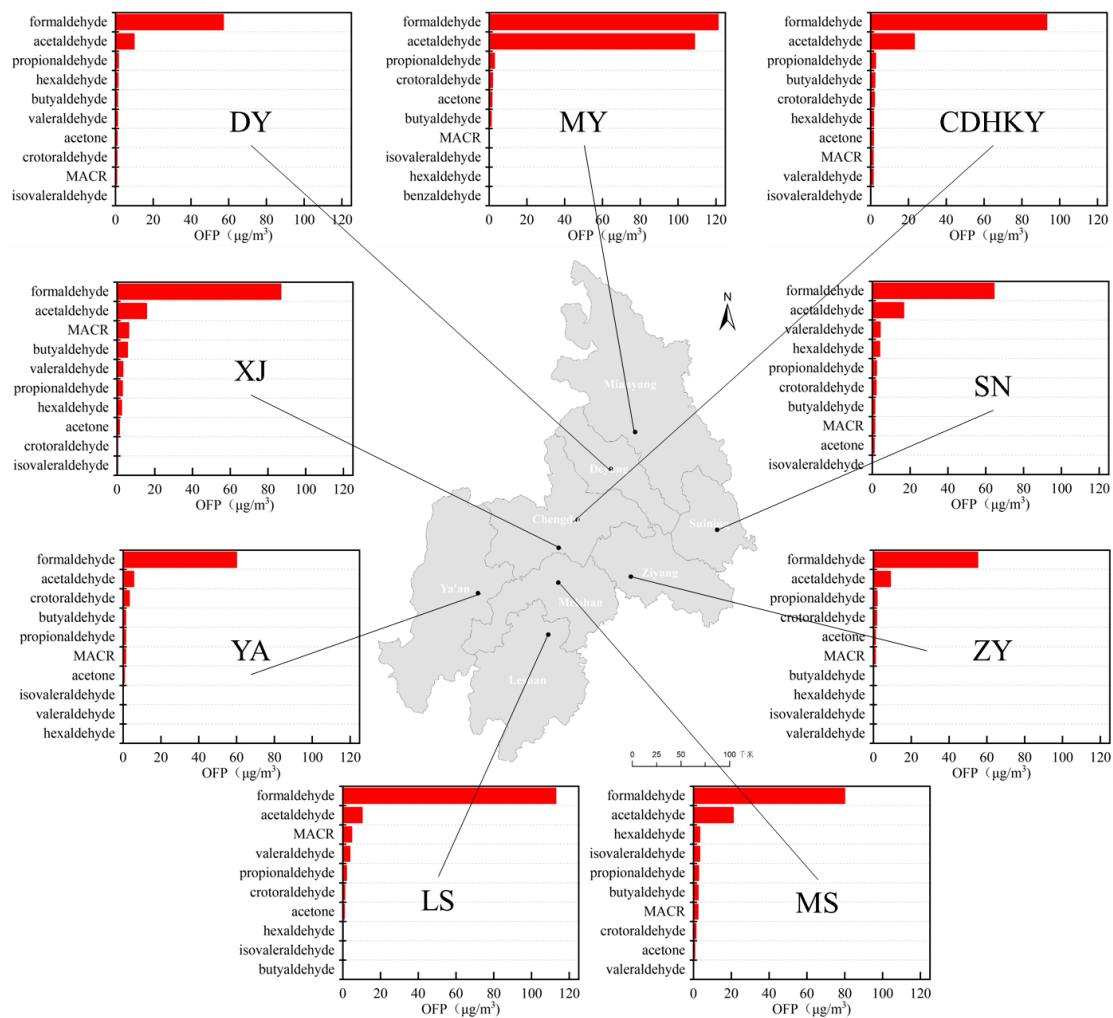

**Figure S3.** Contribution Values of Various VOC Compounds to OFP at Five Sites in the CQUA during the Observation Period.

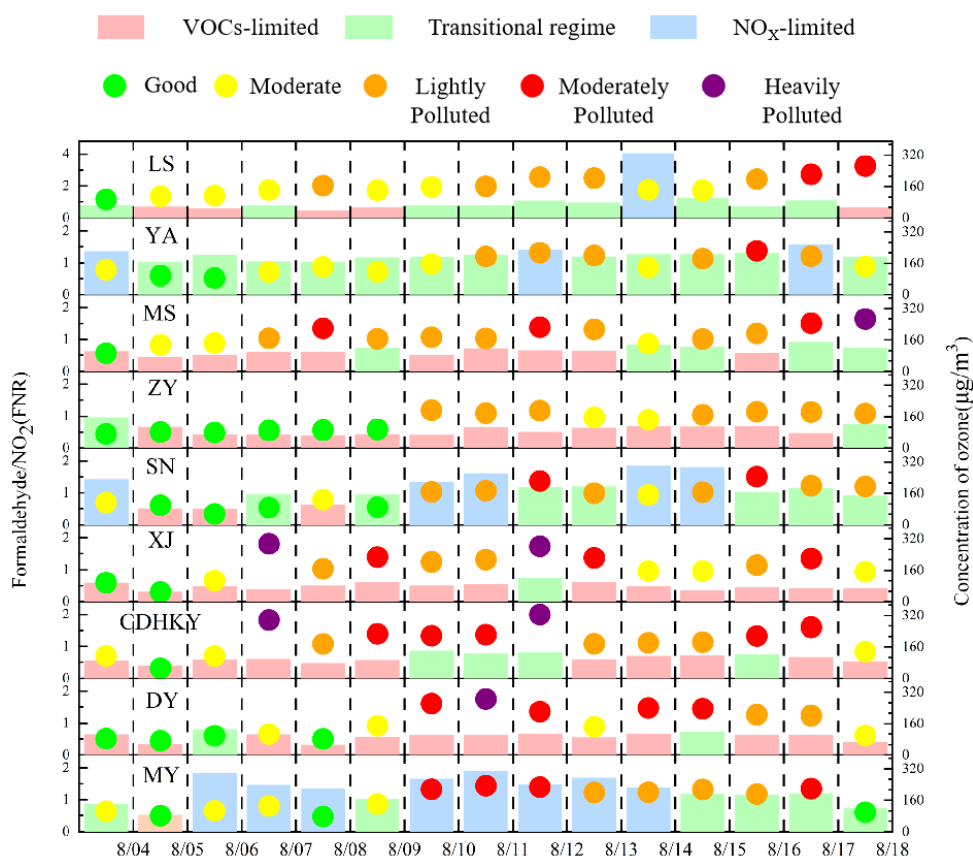

**Figure S4.** Daily Variation of Ozone Assessment Values, Pollution Status, and Ozone Sensitivity at Sites in the CUPA during the Observation Period.

**Table S7.** Proportion of formaldehyde, acetaldehyde and acetone by source at each site in the CUPA during the observation period.

| Sites          | Background and primary emission |              |         | Secondary formation |              |         |
|----------------|---------------------------------|--------------|---------|---------------------|--------------|---------|
|                | Formaldehyde                    | Acetaldehyde | acetone | Formaldehyde        | Acetaldehyde | acetone |
| MY             | 56%                             | -            | 73%     | 44%                 | -            | 27%     |
| DY             | 64%                             | 81%          | 74%     | 36%                 | 19%          | 26%     |
| CDHKY          | 66%                             | 76%          | 70%     | 34%                 | 24%          | 30%     |
| XJ             | 72%                             | 77%          | 78%     | 28%                 | 23%          | 22%     |
| SN             | 50%                             | 46%          | 63%     | 50%                 | 54%          | 37%     |
| ZY             | 56%                             | 81%          | 65%     | 44%                 | 19%          | 35%     |
| MS             | 58%                             | 62%          | 75%     | 42%                 | 38%          | 25%     |
| YA             | 50%                             | 54%          | 45%     | 50%                 | 46%          | 55%     |
| LS             | 80%                             | 83%          | 76%     | 20%                 | 17%          | 24%     |
| <b>Average</b> | 61%                             | 70%          | 69%     | 39%                 | 30%          | 31%     |

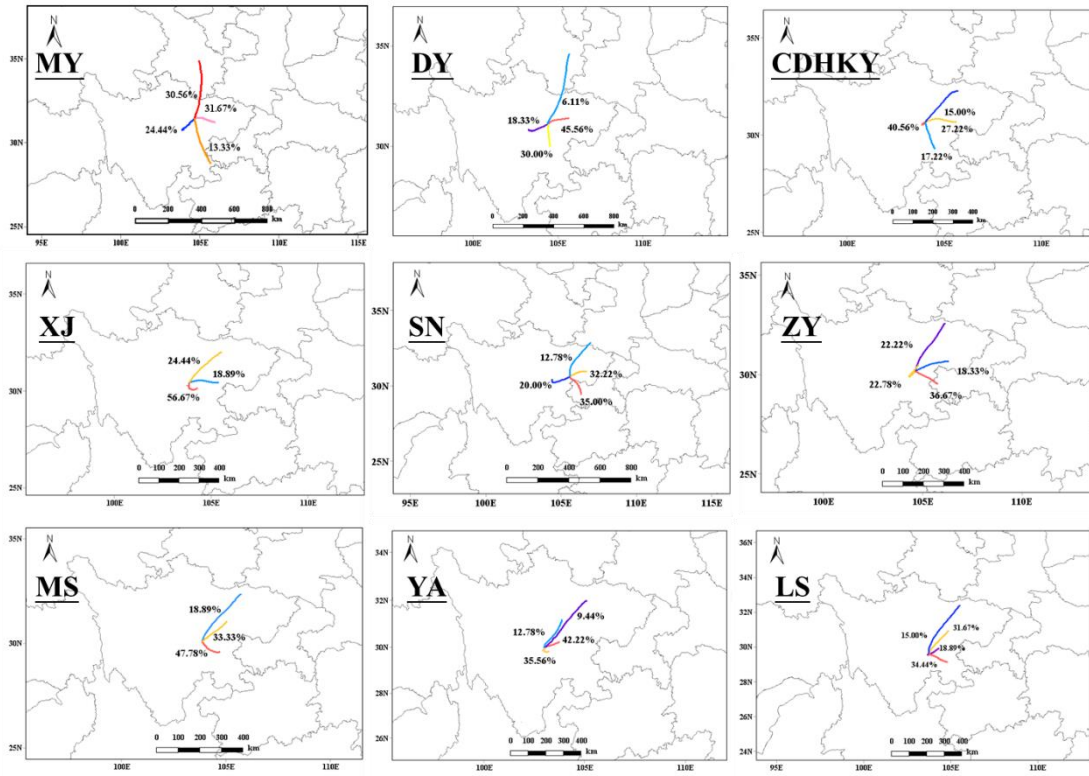

**Figure S5.** Clustering of backward trajectories of sites in the CPUA during the observation period.
